1 **ORIGINAL ARTICLE**

2 **Marine biofilms on different fouling control coating types**  
3 **reveal differences in microbial community composition and**  
4 **abundance**

5  
6 Maria Papadatou<sup>1</sup> | Samuel C. Robson<sup>2,3</sup> | Sergey Dobretsov<sup>4,5</sup> | Joy E.M. Watts<sup>1,3</sup> | Jennifer Longyear<sup>6</sup> |  
7 Maria Salta<sup>1</sup>

8  
9 <sup>1</sup> School of Biological Sciences, University of Portsmouth, Portsmouth, UK

10 <sup>2</sup> School of Pharmacy and Biomedical Sciences, University of Portsmouth, Portsmouth, UK

11 <sup>3</sup> Centre for Enzyme Innovation, University of Portsmouth, Portsmouth, UK

12 <sup>4</sup> Department of Marine Science and Fisheries, College of Agricultural and Marine Sciences, Sultan Qaboos University, Oman

13 <sup>5</sup> Centre of Excellence in Marine Biotechnology, Sultan Qaboos University, Oman

14 <sup>6</sup> AkzoNobel/ International Paint Ltd, Felling, Gateshead, UK

15  
16 **Correspondence:** Maria Salta, School of Biological Sciences, University of Portsmouth, Portsmouth, UK. Email: maria.salta@port.ac.uk  
17 **Funding Information:** University of Portsmouth: 35030/SC00049BIOL

18

19 **Abstract**

20 Marine biofouling imposes serious environmental and economic impacts on marine applications, especially in  
21 the shipping industry. To combat biofouling, protective coatings are applied on vessel hulls which are divided  
22 into two major groups: biocidal and non-toxic fouling-release. The aim of the current study was to explore the  
23 effect of coating type on microbial biofilm community profiles to better understand the differences between  
24 the communities developed on fouling control biocidal antifouling and biocidal-free coatings. Biocidal  
25 (Intersmooth® 7460HS SPC), fouling-release (Intersleek® 900), and inert surfaces were deployed in the marine  
26 environment for 4 months and the biofilms that developed on these surfaces were investigated using Illumina  
27 NGS sequencing, targeting the prokaryotic 16S rRNA gene. The results confirmed differences in the community  
28 profiles between coating types. The biocidal coating supported communities dominated by  
29 Alphaproteobacteria (*Loktanella*, *Sphingorhabdus*, *Erythrobacter*) and Bacteroidetes (*Gilvibacter*), whilst other  
30 taxa such as *Portibacter* and Sva0996 marine group, proliferated on the fouling-release surface. Knowledge of  
31 these marine biofilm components on fouling control coatings will serve as a guide for future investigations of  
32 marine microfouling as well as informing the coatings industry of potential microbial targets for robust coating  
33 formulations.

34

35 **KEYWORDS**

36 biofilms; microbial community; biofouling; antibiofilm strategies; fouling control coatings

37 **1 | INTRODUCTION**

38 Biofouling is the undesirable accumulation of microorganisms, animals, and plants on immersed structures in  
39 aquatic habitats (Railkin, 2004), an omnipresent and highly dynamic phenomenon (Holmström *et al.*, 2006;  
40 Harder 2008). Aquatic biofilms are the pioneering components of the biofouling process (Wahl, 1989; Salta *et al.*,  
41 2013) and constitute assemblages of microbial cells irreversibly attached to living or non-living surfaces,  
42 embedded in a self-produced matrix of hydrated extracellular polymeric substances (EPS) (Zobell & Allen,  
43 1935; Costerton, 1999). Biofouling constitutes a significant issue in maritime industries and problems related  
44 to microfouling include an increase in drag force, modification of surface properties and production of  
45 chemical cues (Dobretsov *et al.*, 2013). To combat biofouling in the shipping industry, fouling control coatings  
46 are applied to ships' hulls where the biofilms first attach (Finnie & Williams 2010). These commercial fouling  
47 control coatings are either: biocidal antifouling or non-biocidal fouling-release coatings.

48 Biocidal antifouling coatings function through the release of certain toxic chemicals (biocides) to deter  
49 the settlement and growth of organisms. Biocidal coatings remain the most popular choice and still dominate  
50 the market reportedly accounting for more than 90% of coatings sales (Lejars *et al.*, 2012; Winfield *et al.*,  
51 2018), although concerns over the potential environmental impact of biocides have led to increased attention  
52 being paid to the development of biocide-free approaches to fouling control (Lejars *et al.*, 2012). Non-biocidal  
53 fouling-release coatings function based on a low surface energy, smooth and non-porous, free of reactive

54 functional groups (Finnie & Williams 2010) which reduces an organism's ability to generate a strong interfacial  
55 bond with the surface (Chambers *et al.*, 2006; Lejars *et al.*, 2012). Thus, such coatings minimize adhesion  
56 strength of organisms and facilitate their removal by water flow. Fouling-release coatings have a smaller  
57 market share when compared to biocidal, since they generally require flow to be effective against biofouling  
58 (Molino *et al.*, 2009; Briand *et al.*, 2012). Although, the coating industry has increasing interest in the  
59 development of biocide-free (micro)fouling control solutions that rely on surface physico-chemical properties.  
60 The development of a successful marine coating that is simultaneously effective against biofouling while being  
61 substantially environmentally benign, is very challenging.

62 Biofilm research is important to the marine coating industry as it directly provides insights into the  
63 response of biofilm communities on coating surfaces, and consequently may inform the development of new  
64 paint technologies. Several studies investigated the effect of fouling control coatings on *in situ* biofilm  
65 community composition either by employing light and epifluorescent microscopy (Cassé and Swain, 2006), or  
66 molecular fingerprinting and microscopic observations (Briand *et al.*, 2012), or flow cytometry coupled with  
67 denaturing gradient gel electrophoresis and light microscopy (Camps *et al.*, 2014); all of which have reported  
68 that the observed biofilm community compositions were influenced by coating type.

69 To date, only a handful of studies have reported the application of next generation sequencing (NGS)  
70 techniques to investigate the response of marine biofilm community profiles developed on marine fouling  
71 control coatings (Muthukrishnan *et al.*, 2014; Leary *et al.*, 2014; Briand *et al.*, 2017; Flach *et al.*, 2017;  
72 Hunsucker *et al.*, 2018; Winfield *et al.*, 2018; von Ammon *et al.*, 2018; Dobretsov *et al.*, 2019; Ding *et al.*, 2019).  
73 NGS technology based on sequencing ribosomal RNA genes, is appropriate for a range of applications including  
74 highly diverse community analysis, while offering large volume of data that allow for statistical testing (Fukuda  
75 *et al.*, 2016). All studies employing high-throughput NGS have reported the dominance of Alphaproteobacteria  
76 on fouling control coatings, whilst Gammaproteobacteria have also been identified as key players in fouling  
77 control systems (Muthukrishnan *et al.*, 2014; Leary *et al.*, 2014; Briand *et al.*, 2017; Flach *et al.*, 2017;  
78 Hunsucker *et al.*, 2018; von Ammon *et al.*, 2018; Dobretsov *et al.*, 2019; Ding *et al.*, 2019). Biofilms on fouling  
79 control coatings have also been dominated by Flavobacteria (Muthukrishnan *et al.*, 2014; Leary *et al.*, 2014;  
80 Hunsucker *et al.*, 2018; von Ammon *et al.*, 2018) or Cyanobacteria (Muthukrishnan *et al.*, 2014; Leary *et al.*,  
81 2014; Hunsucker *et al.*, 2018; Ding *et al.*, 2019). To a smaller extent, prevalence of Planctomycetes (Leary *et al.*,  
82 2014; von Ammon *et al.*, 2018; Ding *et al.*, 2019) and Verrucomicrobia (Leary *et al.*, 2014; Winfield *et al.*,  
83 2018) have also been reported. Taking into account the rapid advances in sequencing technologies, it is  
84 essential to generate up-to-date NGS studies investigating biofilms on fouling control surfaces. Despite the  
85 current knowledge, certain aspects of biofilm research on fouling control coatings remain elusive. Differences  
86 in biofilm profiles between biocidal and fouling-control coatings can help to highlight potential targets of  
87 importance for effective antibiofilm control, as well as identifying potential biocidal-tolerant biofilm  
88 components at low taxonomic levels.

89 The aims of the present study are (1) to explore and characterize marine biofilm communities isolated  
90 from commercial fouling control coatings using 16S rRNA gene amplicon sequencing, and (2) compare the  
91 biofilm profiles developed between fouling-release and biocidal coating types. To reflect the biofilm formation  
92 based on state-of-the-art analyses and study design, a combination of biocidal antifouling coating, fouling-  
93 release coating, and reference surfaces were used, testing *in situ* four biological replicates of biofilms using  
94 Illumina MiSeq sequencing targeting the V4-V5 region of the 16S rRNA gene to examine bacterial composition.  
95 The purpose of this work is to elucidate biofilm components at the genus level that are selectively attached on  
96 biocidal and/or fouling-release surfaces. The study findings will contribute knowledge into the growing body of  
97 NGS studies of biofilms on fouling control paints and subsequently inform the future design of fouling control  
98 surfaces.

## 99 **2 | MATERIALS AND METHODS**

### 100 **2.1 | Commercial fouling control coatings and experimental surfaces**

101 Four treatments were exposed during the immersion study including: (1) a commercial biocidal antifouling  
102 coating which will be termed as "BAC" (Intersmooth® 7460HS SPC, self-polishing copolymer coating that  
103 contains cuprous oxide and copper pyrithione biocides), (2) a commercial non-biocidal fouling-release coating  
104 which will be termed as "FRC" (Intersleek® 900, fluoropolymer), (3) a non-biocidal inert surface termed as  
105 "PDMS" (silicone paint film incorporating a generic unmodified polydimethylsiloxane matrix), and (4) a

106 stainless steel surface termed as “SS”. A red pigmentation was incorporated in all coated panels to minimize  
107 potential influence of surface colour on community variation. Details of all surfaces are presented in Table S1.

108 Experimental panels were prepared by brush application at the International Paint laboratories in  
109 Gateshead UK following the correct scheme for each coating type (BAC: anticorrosive primer plus finish coat;  
110 FRC, PDMS: anticorrosive primer, silicone tie coat, finish coat). The panels were double-side coated with  
111 dimensions 8.5 x 8.5 cm<sup>2</sup>.

## 112 **2.2 | Panel deployment and study site**

113 Experimental panels were attached to a metal frame using cable ties and deployed to the anchored University  
114 of Portsmouth (UoP) raft (50°48'23.4"N 1°01'20.1"W) in Langstone Harbour UK. Frames were immersed  
115 vertically to the seawater surface at 0.5 – 1 m depth for a period of 119 days from April 6<sup>th</sup> until August 3<sup>rd</sup>,  
116 2018 (Figure S1).

117 The sampling location is characterized as a semi-diurnal system, where two high and two low tides  
118 take place every 24-hours. It has a temperate climate moderated by prevailing southwest winds and significant  
119 rainfall.

## 120 **2.3 | Biofilm sample collection and storage**

121 The biofilms samples were collected (n=4 per coating) from panels using sterile swabs (Figure S2).  
122 Macrofoulers were removed from heavily fouled panels using sterile forceps. The swab was passed 10 times  
123 over the panel with circular movements for biofilm collection. During sampling, the frames were manually  
124 removed from the seawater and exposed to air during collection, for approximately 5-15 min. Between  
125 sampling, all panels were hydrated with surrounding seawater. After biofilm collection, each swab was placed  
126 into a sterile Eppendorf tube and the breakpoint was cut out using sterile scissors. Samples were then  
127 immediately snap frozen in liquid nitrogen (in the field), transferred to the laboratory and stored at -80 °C  
128 within 4 hours. DNA extraction took place within 2 months from sampling.

129 At the end point collection, the SS samples were found thoroughly covered in macrofouling and  
130 biofilms were not recoverable from these panels. Therefore, it was decided that this treatment type will be  
131 dropped from the present investigation as it was technically unusable for the study of microfouling.

## 132 **2.4 | DNA extraction and quantification**

133 Genomic DNA (gDNA) was extracted using the DNeasy PowerBiofilm Kit (QIAGEN). The samples were  
134 transferred from -80 °C to room temperature. In a laminar flow hood, each biofilm swab sample was placed  
135 into a PowerBiofilm Bead Tube using sterile forceps. Qiagen's protocol (DNeasy® November 2016) was  
136 followed according to the manufacturer's instructions, except the first step was omitted, since the saturated  
137 biofilm material was attached to the swab, therefore no weighing and centrifugation was applicable. To bead-  
138 beat the sample, a PowerLyzer 24 Homogenizer (MP Biomedical, FastPrep-24™ 5G) was used. At the final step,  
139 extracted DNA was eluted following manufacturer's instructions and stored in -80 °C. The quantity and partial  
140 quality of nucleic acid samples were assessed based on absorbance spectrums using a spectrophotometer  
141 (Thermo Scientific, NanoDrop 1000).

## 142 **2.5 | Next Generation Sequencing**

143 Twelve lyophilized gDNA samples (50 µL) were supplied to the Molecular Research DNA Lab  
144 ([www.mrdnalab.com](http://www.mrdnalab.com), Shallowater, TX USA). High-throughput amplicon sequencing covering the V4-V5 region  
145 of the 16S rRNA gene was performed on an Illumina Miseq 2 × 300 paired-end platform (Illumina, San Diego,  
146 CA USA) using the universal primers 515F (GTGYCAGCMGCCGCGTAA) and 926R (CCGYCAATTYMTTTRAGTTT)  
147 (Parada *et al.*, 2016) following the manufacturer's guidelines.

## 148 **2.6 | Bioinformatic analyses**

149 Raw sequence data were trimmed using Trim Galore (Babraham Bioinformatics, Cambridge UK) with  
150 parameters '*--illumina -q 20 --stringency 5 -e 0.1 --length 20 --trim-n*'. Filtered reads were processed in QIIME2  
151 (Bolyen *et al.*, 2019) using the standard 16S rRNA gene amplicon analysis pipeline. Briefly, paired reads were  
152 joined, denoised using 'qiime dada2 denoise-paired', and sequences were clustered into operational  
153 taxonomic units (OTUs) that were annotated against the SILVA SSU 132 database (Pruesse *et al.*, 2012; Quast  
154 *et al.*, 2013; Yilmaz *et al.*, 2014) by clustering at 99% sequence similarity cutoff (1% divergence).

155 The generated OTU table was then analysed using the R programming language (version 4.0.2) (R  
156 Core Team, 2020). The phylogenetic analysis was implemented using the *phyloseq* package (McMurdie &  
157 Holmes, 2013) available as part of the Bioconductor project (Gentleman *et al.*, 2004), which supports OTU-  
158 clustering formats and provides ecology and phylogenetic tools. Sequences detected with high similarity to

159 chloroplast and mitochondria from the eukaryotic component of the community, were removed from the  
 160 analysis. Plots were generated using *ggplot2* library (Wickham, 2016).

## 161 2.7 | Statistical analyses

162 Statistical tests were performed in *R*. The significance of coating type on the resulting diversity indices (Chao1,  
 163 Shannon) was assessed by ANOVA (Sum of Squares Type II), followed by the estimated marginal means  
 164 (EMMs) to identify significant differences between pairwise comparisons.

165 Biofilm community structure (relative abundance) of phyla, classes, families and genera was  
 166 evaluated for changes between coating types using analysis of similarities (ANOSIM) (Clarke, 1993) in the  
 167 *vegan R* package (Oksanen *et al.*, 2019) with Bray-Curtis of 9999 permutations. To determine finer resolution  
 168 taxa (genus level) that significantly contribute to differences between coating samples diversity (shown in  
 169 ANOSIM), similarity percentages analysis (SIMPER) (Clarke, 1993) in *vegan* was performed using *kruskal.pretty*  
 170 function (Steinberger, 2016) for Kruskal-Wallis tests of multiple comparisons. OTUs were deemed significant  
 171 and presented for genera that contribute at least >1.5% of the variance between at least one pairwise  
 172 comparison with Kruskal *p* value < 0.05.

## 173 3 | RESULTS

### 174 3.1 | Quality of biofilm OTUs revealed with Illumina MiSeq sequencing

175 The 16S rRNA gene dataset recovered from amplicon sequencing of the V4-V5 region using Illumina MiSeq  
 176 resulted in 2,409,154 raw total sequences of 251 base pair length. The final filtered dataset consisted of  
 177 1,451,982 read pairs, with coverage ranging from 73,764 for sample PDMS\_b to 215,665 for sample BAC\_a  
 178 (Table 1). The average number of filtered read pairs per sample was 91,918 for PDMS, 100,498 for FRC, and  
 179 170,580 for BAC.

180 Following processing and clustering at the 99% sequence similarity, the 12 biofilm samples produced  
 181 a total of 2,113 distinct OTUs. The average number of OTUs per sample was 314 for PDMS, 265 for FRC, 96 for  
 182 BAC. The average number of OTU abundance per samples was 28,972 for PDMS, 27,851 for FRC, and 16,836  
 183 for BAC (Table 1).

184  
 185 **TABLE 1** Characteristics of replicated biofilm samples including the sample type where biofilms were collected from, DNA  
 186 concentration and quality ratios, number of reads retrieved and assigned OTUs.

| Sample Type  | Replicate | Concentration (ng/mL) | 260/280 ratio | 260/230 ratio | Filtered read pairs | OTU abundance | OTUs |
|--------------|-----------|-----------------------|---------------|---------------|---------------------|---------------|------|
| PDMS         | a         | 115.2                 | 1.93          | 2.14          | 76,850              | 24,018        | 255  |
| PDMS         | b         | 91.2                  | 1.83          | 1.30*         | 73,764              | 19,833        | 213  |
| PDMS         | c         | 63.7                  | 1.86          | 0.70*         | 97,941              | 32,263        | 384  |
| PDMS         | d         | 100.0                 | 1.85          | 1.66          | 119,116             | 39,773        | 403  |
| average      |           |                       |               |               | 91,918              | 28,972        | 314  |
| FRC          | a         | 26.0                  | 1.92          | 0.83*         | 83,046              | 25,663        | 270  |
| FRC          | b         | 29.7                  | 1.67*         | 0.19*         | 108,840             | 24,330        | 199  |
| FRC          | c         | 62.5                  | 1.87          | 1.42*         | 105,287             | 29,855        | 283  |
| FRC          | d         | 67.5                  | 1.82          | 1.24*         | 104,818             | 31,555        | 308  |
| average      |           |                       |               |               | 100,498             | 27,851        | 265  |
| BAC          | a         | 65.4                  | 1.95          | 1.22*         | 215,665             | 19,644        | 101  |
| BAC          | b         | 41.7                  | 1.75*         | 1.14*         | 144,125             | 15,959        | 96   |
| BAC          | c         | 204.2                 | 1.86          | 2.04          | 171,618             | 16,445        | 90   |
| BAC          | d         | 207.6                 | 1.87          | 1.89          | 150,912             | 15,297        | 98   |
| average      |           |                       |               |               | 170,580             | 16,836        | 96   |
| <b>Total</b> |           |                       |               |               | <b>1,451,982</b>    |               |      |

187 \* These samples values did not meet the suggested criteria for optimal sample quality: (i) DNA yield level above  
 188 20 ng/μL, (ii) 260/280 ratio between 1.8-2.1, (iii) 260/230 ratio above 1.5, as suggested by Peimbert & Alcaraz (2016).  
 189

190 **3.2 | Biofilm diversity analysis**

191 **3.2.1 | Alpha diversity**

192 The alpha diversity indices were calculated after rarefaction to 15,000 OTU depth (per sample) (Table 2, Figure  
 193 S3). At the 15,000 OTU depth, Chao1 index varied for the individual samples between 128 (sample BAC\_c) and  
 194 531 (sample PDMS\_d), with the lowest values found consistently in BAC sample (Table 2). The average Chao1  
 195 per sample type was 412 for PDMS, 376 for FRC and 137 for BAC. Since at the 15,000 OTU depth, Shannon  
 196 index ranged between 4.13 and 6.01, with the lowest average values observed in BAC samples and the highest  
 197 in PDMS samples (Table 2). The results demonstrate that BAC samples exhibited a lower diversity abundance  
 198 and evenness compared to the FRC or PDMS samples, and possibly encountered fewer rare (low abundance)  
 199 species.

201 **TABLE 2** Alpha diversity indices (a) for all replicate samples per treatments rarefied to 15,000 OTU depth, and (b) for  
 202 averaged samples per treatment rarefied to 15,000, 10,000, 1,000 OTU depths.

203 (a)

| Sample Type | Replicate | OTU depth | Observed diversity | Chao1  | Shannon |
|-------------|-----------|-----------|--------------------|--------|---------|
| PDMS        | a         | 15,000    | 359.80             | 360.82 | 5.55    |
| PDMS        | b         | 15,000    | 292.00             | 292.76 | 5.35    |
| PDMS        | c         | 15,000    | 458.10             | 462.60 | 5.84    |
| PDMS        | d         | 15,000    | 527.60             | 531.35 | 6.01    |
| FRC         | a         | 15,000    | 362.00             | 363.45 | 5.59    |
| FRC         | b         | 15,000    | 292.90             | 294.47 | 5.26    |
| FRC         | c         | 15,000    | 404.30             | 407.30 | 5.67    |
| FRC         | d         | 15,000    | 434.90             | 437.93 | 5.77    |
| BAC         | a         | 15,000    | 144.90             | 146.11 | 4.33    |
| BAC         | b         | 15,000    | 137.20             | 137.68 | 4.21    |
| BAC         | c         | 15,000    | 128.00             | 128.00 | 4.44    |
| BAC         | d         | 15,000    | 136.40             | 136.98 | 4.13    |

204 (b)

| Sample Type | OTU depth | Observed diversity | Chao1  | Shannon |
|-------------|-----------|--------------------|--------|---------|
| PDMS        | 15,000    | 409.38             | 411.88 | 5.69    |
| PDMS        | 10,000    | 405.53             | 411.51 | 5.68    |
| PDMS        | 1,000     | 309.83             | 366.26 | 5.48    |
| FRC         | 15,000    | 373.53             | 375.79 | 5.57    |
| FRC         | 10,000    | 370.65             | 374.94 | 5.57    |
| FRC         | 1,000     | 288.20             | 336.86 | 5.39    |
| BAC         | 15,000    | 136.63             | 137.20 | 4.28    |
| BAC         | 10,000    | 136.13             | 137.01 | 4.27    |
| BAC         | 1,000     | 119.43             | 127.28 | 4.20    |

205  
 206 The alpha diversity indices calculated at lower sub-sampling depths, i.e. 10,000 and 1,000 displayed consistent  
 207 patterns with the maximum OTU count identified for all replicates (15,000). Overall, BAC replicate samples  
 208 showed the lowest observed diversity, Chao1 and Shannon indices (Table 2) confirmed by the number of OTUs  
 209 (Table 1), whilst FRC and PDMS samples were characterized by higher and close scores. Notably, BAC samples  
 210 exhibited the highest number of raw reads (highest coverage) compared to the other two surfaces (Table 1).  
 211 These contrasting results confirm that the low diversity of BAC samples in the present dataset is not a result of  
 212 potential low sequence coverage, but rather the presence of few very abundant biofilm taxa.

213 A significant difference between Chao1 estimates in different treatments at the 15,000 OTU depth  
 214 was shown ( $p = 0.0003^{***}$ ,  $F = 23.62$ ) and the pairwise comparisons revealed significant difference between  
 215 BAC – PDMS ( $p = 0.0004$ ) and BAC – FRC ( $p = 0.0007$ ) but not for PDMS – FRC ( $p = 0.915$ ). The same tests for  
 216 Shannon diversity index showed significant difference between sample types ( $p = 0.0002^{***}$ ,  $F = 24.5$ ), and the  
 217 pairwise comparisons revealed significant difference between BAC – PDMS ( $p = 0.0005$ ) and BAC – FRC ( $p =$   
 218  $0.0005$ ) but not for PDMS – FRC ( $p = 1$ ).

219 The alpha diversity plots (for each index) of the relative abundance across OTUs for each replicate  
 220 coating type (Figure 1) reflected the diversity indices estimations based on sub-sampled OTU depths (Table 2).

221 BAC replicate samples were the lowest, whilst replicates of PDMS and FRC samples had higher and closer  
222 measurements.  
223

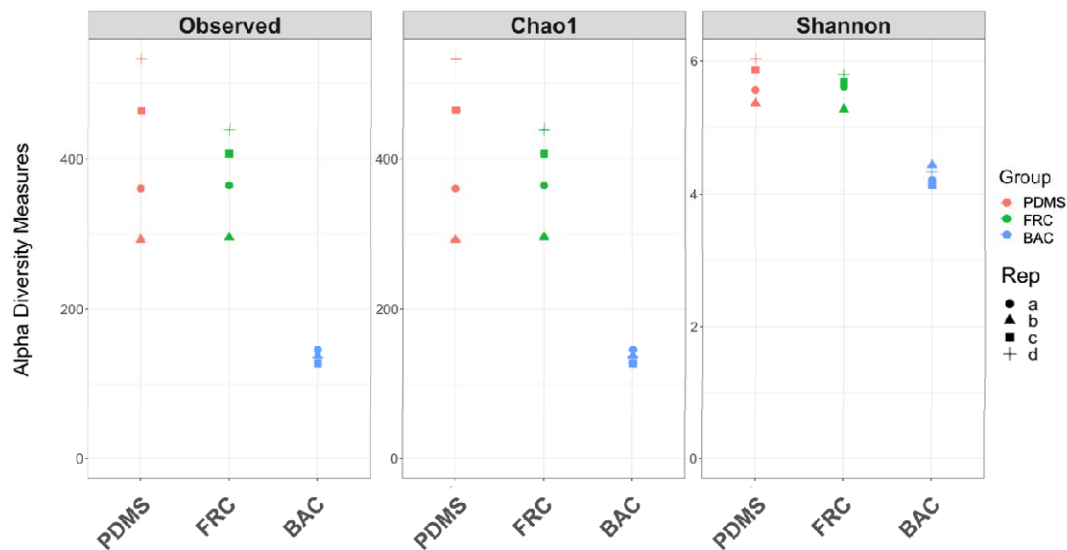

243 **FIGURE 1** Alpha diversity estimates including the observed (unique OTUs), Chao1 and Shannon indices. Alpha diversity  
244 scores are plotted for the four replicates of each coating type. Samples are coloured by coating type, each of the four  
245 replicates is indicated by a different symbol.  
246

### 247 3.2.2 | Beta diversity

248 The Principal Coordinates Analysis (PCoA) plot of the relative abundance of OTUs across the dataset revealed  
249 distinct communities in BAC samples, whilst FRC and PDMS biofilm communities showed significant overlap  
250 (Figure 2). This PCoA plot captures 45.8% of variation in relative abundance across the dataset, with  
251 differences between BAC and both FRC and PDMS samples accounting for the majority (34.6%).  
252

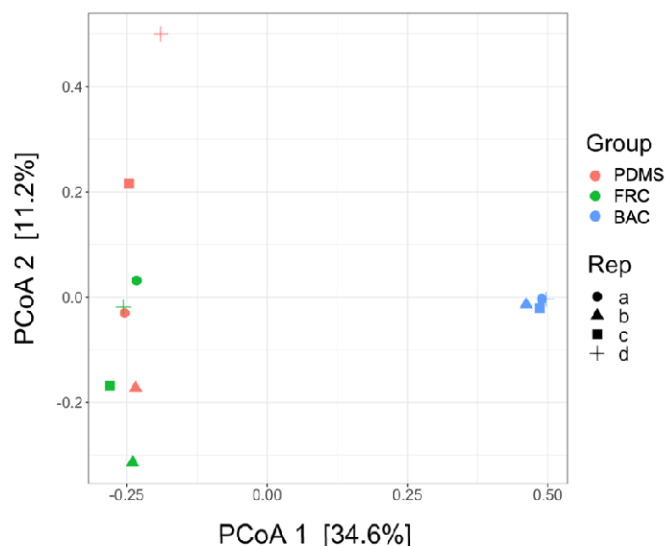

272 **FIGURE 2** Principal coordinates analysis (PCoA) plot of the relative abundance across OTUs for each individual coating  
273 sample including PDMS, FRC, and BAC from 16S rRNA amplicon sequencing analysis. Variations in the dataset are explained  
274 by 34.6% with the first principal coordinate axis (PCoA 1) and 11.2% with the second axis (PCoA 2).

### 275 3.2.3 | Core biofilm microbiome

276 Particular groups that contribute to similarities (shared) and differences (distinct) between treatments were  
277 quantified and illustrated at the genus level. More specifically, OTU genera are shown with 0% threshold  
278 regardless their abundance in the dataset (Figure 3a), and genera with at least 1% abundance are also shown  
279 in the dataset (Figure 3b).

280 A total of 60 genera were shared between all samples despite their abundance as shown in Figure 3a,  
281 whilst a higher number of genera (76) were found shared between FRC and PDMS biofilms, suggesting that  
282 community structures of these two surfaces were similar. Mirroring the alpha diversity patterns, distinct  
283 biofilm genera on FRC (34) and PDMS (44) samples were more diverse, contrary to BAC samples which  
284 contained only 18 separate genera.

285 In terms of abundant genera in the dataset that encounter for at least 1% in the community, only 4  
286 taxa were seen in common between all treatments, whilst the BAC samples showed the greatest number of  
287 surface-specific genera with 9 (Figure 3b). Therefore, the biofilm community present in BAC samples  
288 potentially contributed to the total dataset with less diverse but highly abundant genera (9 out of 18), as  
289 highlighted by the low alpha diversity measures (Table 2).

290 Overall, the core community of unique OTUs shared between all samples consisted of diverse genera  
291 (60) (Figure 3a), with only a small fraction of them (4) contributing with 1% abundance to the core community  
292 of abundant OTUs (Figure 3b). These results signify that the differences between surface types are defined  
293 from a few taxa that are abundant in this biofilm community.

294

295

296

297

298

299

300

301

302

303

304

305

306

307

308

309

310

311

312

313

314

315

316

317

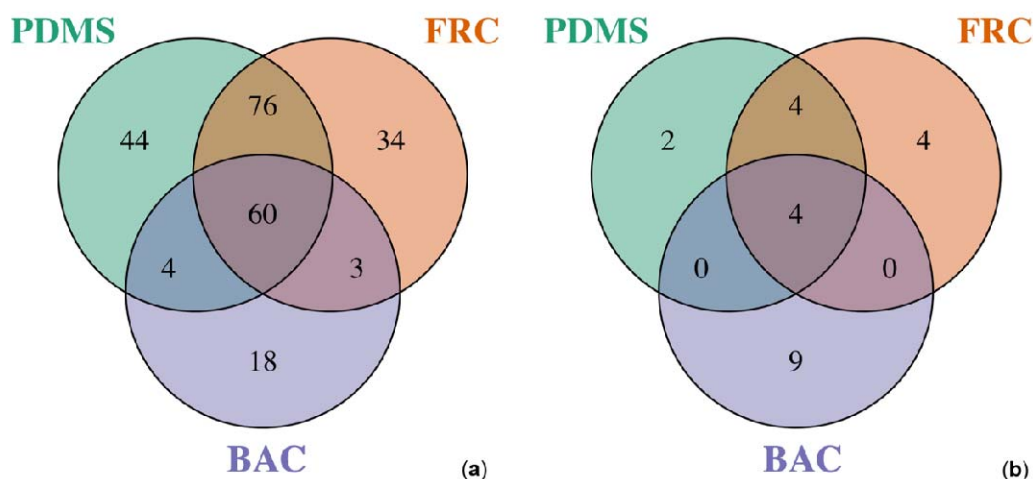

313 FIGURE 3 Venn diagrams representing the number of unique genera identified across OTUs identified with a relative  
314 abundance greater than (a) 0% or (b) 1% on each coating type from 16S rRNA amplicon sequencing. The overlap represents  
315 genera seen amongst the community of multiple surfaces.

316

### 317 3.3 | Biofilm taxonomic composition explored with 16S rRNA gene marker

318 The biofilm taxonomic analysis revealed 24 phyla, 39 classes, 110 orders, 149 families and 206 genera present  
319 across the three surfaces. Community composition was calculated based on percentages of the total OTUs,  
320 and below the relative abundant top taxa are presented for different taxonomic levels.

#### 321 3.3.1 | Prokaryotic biofilm composition at the class level

322 Using relative abundance comparisons, the biofilms in FRC and BAC samples displayed different microbial  
323 compositions at the class level (Figure 4). Alphaproteobacteria and Bacteroidia were found consistently high  
324 across all samples, followed by Gammaproteobacteria and Deltaproteobacteria. In the biofilm community  
325 profiles of FRC and PDMS samples Acidimicrobiia and Oxyphotobacteria (phylum Cyanobacteria) were  
326 prevailing, whereas OM190 (phylum Planctomycetes) and BD7-11 (phylum Planctomycetes) were found  
327 enriched only in BAC samples.

328

329

330  
331  
332  
333  
334  
335  
336  
337  
338  
339  
340  
341  
342  
343  
344  
345  
346  
347  
348  
349

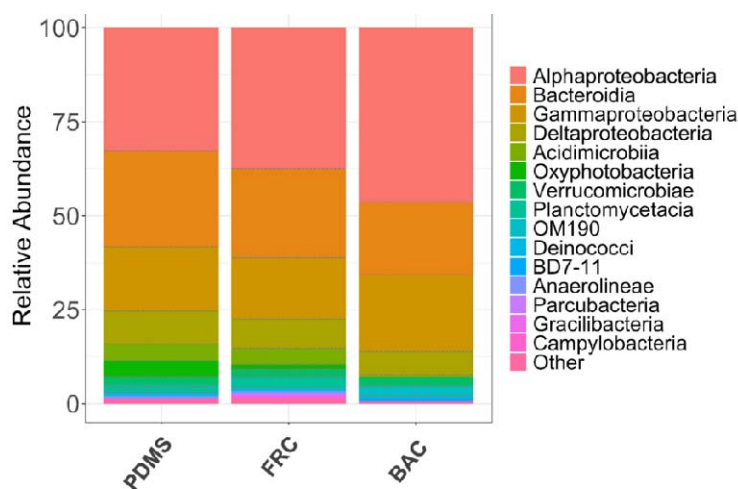

FIGURE 4 Relative abundance (%) of the top 15 abundant bacterial classes present in all biofilm samples of the PDMS, FRC and BAC surfaces using combined replicates.

### 3.3.2 | Prokaryotic biofilm composition at the genus level

The biofilm taxonomic profile of the 15 most dominant genera was further demonstrated at the genus level (Figure 5). Using relative abundance, the most prevalent genera in BAC biofilms were *Loktanella* (7.4%), *Gilvibacter* (6.4%), *Erythrobacter* (5%), *Sphingorhabdus* (3.7%), *Sulfitobacter* (2.7%), and *Arenicella* (2.6%), while other unclassified genera contributed to 6.4%. The most abundant genera in FRC samples were *Portibacter* (2.9%), Sva0996 marine group (2.2%), *Robiginitomaculum* (2.1%), and *Altererythrobacter* (2%), with 16.2% to be attributed to unclassified genera. The dominant genera in the PDMS untreated surface biofilms were *Portibacter* (4.1%), Sva0996 marine group (2.5%), *Robiginitomaculum* (2.1%), *Sulfitobacter* (2.1%) and 16.3% of unclassified genera. Overall, the FRC and PDMS samples exhibited similar biofilm community profiles compared to the BAC, although the most profound differences were the higher *Altererythrobacter*, and *Litorimonas* and smaller *Portibacter* percentages in the FRC samples.

The most pronounced differences between BAC and FRC communities were the dominance of *Loktanella* (class Alphaproteobacteria), *Erythrobacter* (class Alphaproteobacteria), *Gilvibacter* (class Bacteroidia) and *Sphingorhabdus* (class Alphaproteobacteria) in BAC, whilst *Portibacter* (class Bacteroidia), *Robiginitomaculum* (class Alphaproteobacteria), and Sva0996 marine group (class Acidimicrobiia) were prevailing in FRC (Figure 5). The community profile in BAC contrary to PDMS samples increased relative abundance of the genera of *Loktanella*, *Erythrobacter*, *Gilvibacter*, *Arenicella*, *Altererythrobacter*, *Litorimonas* and *Sphingorhabdus* and decreased relative abundance of *Portibacter*, *Robiginitomaculum*, and Sva0996 marine group in BAC samples.

369  
370  
371  
372  
373  
374  
375  
376  
377  
378  
379  
380  
381  
382  
383  
384  
385  
386  
387

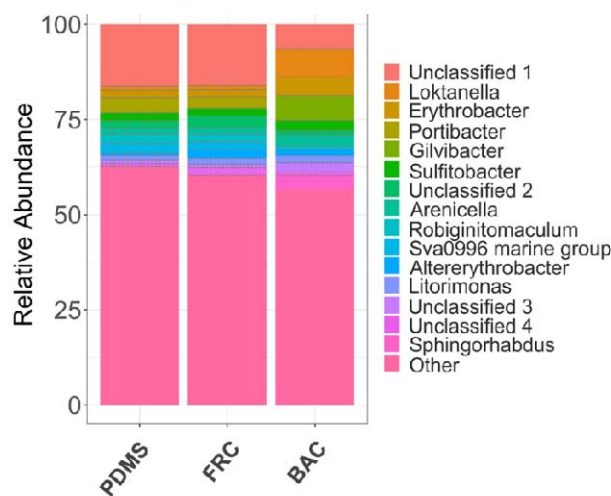

FIGURE 5 Visualization of the taxonomic profile based on the relative abundance (%) of the top 15 abundant genera in all biofilm samples isolated from PDMS, FRC, and BAC using combined replicates.



### 388 3.4 | Significantly contributing biofilms to community profiling

389 Biofilm community structure was profiled based on the Bray-Curtis dissimilarity metric and examined with  
 390 ANOSIM to identify significant differences between coating types at the phylum ( $R = 0.604$ ,  $p = 0.0007^{***}$ ), class  
 391 ( $R = 0.509$ ,  $p = 0.006$ ), family ( $R = 0.787$ ,  $p = 0.002$ ) and genus ( $R = 0.75$ ,  $p = 0.000^{***}$ ) levels.

392 The genera that significantly contribute to these differences in beta-diversity among coating types  
 393 were determined by SIMPER analysis (Table 3). In total, 24 OTU biofilm genera changed with coating type  
 394 (SIMPER contribution > 1.5%, Kruskal  $p$  value < 0.05). Statistical differences were significantly driven by  
 395 *Loktanella* ( $p = 0.02$ ), *Gilvibacter* ( $p = 0.02$ ), *Erythrobacter* ( $p = 0.02$ ), *Portibacter* ( $p = 0.02$ ), *Sva0996* marine  
 396 group ( $p = 0.02$ ), *Sphingorhabdus* ( $p = 0.01$ ) and several unclassified genera.

398 **TABLE 3** The significant contribution (SIMPER % > 1.5 %, Kruskal  $p$  value < 0.05) of biofilm genera to the total similarity  
 399 percentages between the different coatings revealed with SIMPER analysis.  
 400

| Genus                       | Comparisons |           |          |           |          |           |
|-----------------------------|-------------|-----------|----------|-----------|----------|-----------|
|                             | BAC/FRC     |           | BAC/PDMS |           | FRC/PDMS |           |
|                             | SIMPER %    | $p$ value | SIMPER % | $p$ value | SIMPER % | $p$ value |
| Unclassified 1              | 9.27        | 0.02      | 9.41     | 0.02      | 4.03     | 1*        |
| <i>Loktanella</i>           | 6.22        | 0.02      | 6.15     | 0.02      | -        | -         |
| <i>Gilvibacter</i>          | 6.00        | 0.02      | 6.12     | 0.02      | -        | -         |
| <i>Sphingorhabdus</i>       | 3.64        | 0.01      | 3.60     | 0.01      | -        | -         |
| <i>Erythrobacter</i>        | 3.14        | 0.02      | 3.25     | 0.02      | 1.89     | 0.77*     |
| <i>Portibacter</i>          | 2.68        | 0.02      | 3.84     | 0.02      | 2.52     | 0.04      |
| Unclassified 5              | 2.29        | 0.02      | 2.25     | 0.02      | -        | -         |
| <i>Sva0996</i> marine group | 2.04        | 0.02      | 2.60     | 0.02      | 1.94     | 0.25*     |
| <i>Aquimarina</i>           | 1.95        | 0.01      | 1.54     | 0.02      | -        | -         |
| <i>Lentimonas</i>           | 1.80        | 0.08*     | 1.91     | 0.02      | -        | -         |
| Unclassified 2              | 1.71        | 0.02      | -        | -         | 2.31     | 0.04      |
| <i>Dokdonia</i>             | 1.66        | 0.02      | 2.11     | 0.02      | 1.05*    | 0.08*     |
| <i>Peredibacter</i>         | 1.64        | 0.02      | 1.69     | 0.01      | -        | -         |
| <i>Marinobacter</i>         | 1.55        | 0.01      | 1.53     | 0.01      | -        | -         |
| <i>Altererythrobacter</i>   | 1.33*       | 0.56*     | 1.13*    | 0.25*     | 3.18     | 0.25*     |
| <i>Amylibacter</i>          | 1.27*       | 0.39*     | -        | -         | 3.09     | 0.15*     |
| Phormidesmis<br>ANT.LACV5.1 | -           | -         | 2.08     | 0.02      | 2.91     | 0.02      |
| <i>Litorimonas</i>          | 1.20*       | 0.77*     | -        | -         | 2.56     | 0.25*     |
| Unclassified 4              | 1.17*       | 0.08*     | -        | -         | 2.51     | 0.15*     |
| <i>Arenicella</i>           | 1.28*       | 0.15*     | 1.01*    | 0.25*     | 2.19     | 0.39*     |
| Schizothrix LEGE 07164      | -           | -         | 1.38*    | 0.02      | 2.01     | 0.08*     |
| OM27 clade                  | 1.10*       | 0.15*     | -        | -         | 1.82     | 0.77*     |
| <i>Rubidimonas</i>          | -           | -         | 1.24*    | 0.01      | 1.79     | 1*        |
| <i>Lewinella</i>            | -           | -         | 1.53     | 0.01      | 1.60     | 0.15*     |

\* These values indicate lower (SIMPER < 1.5 %) or not significant (Kruskal  $p$  value > 0.05) contribution (%).

## 403 4 | DISCUSSION

404 In the present study, marine biofilms developed on two commercial fouling control coatings were examined.  
405 Biocidal antifouling and fouling-release coated panels were sampled following a four-month sea immersion  
406 period and analysed using Illumina Miseq sequencing targeting the V4-V5 region of prokaryotic 16S rRNA gene.  
407 The age of the biofilm was previously shown to be positively associated with the number of taxa settled  
408 (Huggett *et al.*, 2009; Winfield *et al.*, 2018). Additionally, the “BAC” (Intersmooth® 7460HS SPC) can be  
409 specified for use with in-service lifetimes of up to 90 months (see product description here). Therefore, the  
410 extended exposure of 119 immersion days was deliberately chosen.

### 411 4.1 | Reported marine biofilm taxonomic profiles on fouling control coatings

412 The dominant phyla of the examined marine biofilms on the panels coated with two commercial fouling  
413 control coatings (BAC, FRC) and one inert surface (PDMS) were Proteobacteria, Bacteroidetes, Planctomycetes,  
414 Actinobacteria, Cyanobacteria and Verrucomicrobia (Figure S4). Bacteria belonging to the classes of  
415 Alphaproteobacteria (33-47%), Bacteroidia (19-25%), and Gammaproteobacteria (16-20%), were the most  
416 dominant across all samples (Figure 4), individually contributing to more than 16% of the total biofilm  
417 community for each coating type. Deltaproteobacteria (6-9% each treatment) and Verrucomicrobiae (2% each  
418 treatment) were also dominant and present in all biofilms. When comparing with PDMS, Oxyphotobacteria,  
419 Acidimicrobia, Planctomycetacia were similarly abundant (>1%) in FRC samples but less pronounced (<0.5 -  
420 0.1%) in BAC samples. In all taxonomic rankings the lowest abundance of other taxa was reported in BAC  
421 biofilms, which is potentially due to the lowest OTU diversity in BAC samples compared to the other surfaces.

422 The relative abundance for bacterial phyla observed in this 16S rRNA gene amplicon study is in line  
423 with the metagenomic studies of Leary *et al.*, (2014), and Ding *et al.*, (2019). Proteobacteria, Bacteroidetes  
424 and Cyanobacteria have been repeatedly reported in biofilms sampled from fouling control coated surfaces  
425 (Muthukrishnan *et al.*, 2014; Leary *et al.*, 2014; Hunsucker *et al.*, 2018; Ding *et al.*, 2019). Planctomycetes  
426 (classes of BD7-11 and OM190) that were found abundant in the biofilms sampled from all three surface types  
427 (>2.5%) in this study, have also been previously recorded on fouling control surfaces (Leary *et al.*, 2014; von  
428 Ammon *et al.*, 2018; Ding *et al.*, 2019), although this phylum is underestimated by previous NGS biofilm  
429 studies on fouling control coatings (e.g. Muthukrishnan *et al.*, 2014; Briand *et al.*, 2017; Flach *et al.*, 2017;  
430 Hunsucker *et al.*, 2018; Winfield *et al.*, 2018; Dobretsov *et al.*, 2019). Although not frequently reported,  
431 Verrucomicrobia has also been found in fouling control studies (Leary *et al.*, 2014; Winfield *et al.*, 2018), and  
432 was confirmed to be abundant in all three coating treatments (>1.8%) in this study.

433 The dominant genera (>2% each genus) shared between the marine biofilms sampled in this study  
434 differed with coating type. The community developed on the PDMS surface was dominated by *Portibacter*,  
435 Sva0996 marine group, *Robiginitomaculum*, Phormidismis ANT.LACV5.1, *Sulfitobacter* and unclassified clades.  
436 Similarly, the taxonomic profile of the most abundant genera in FRC samples was characterised by *Portibacter*,  
437 Sva0996 marine group, *Robiginitomaculum*, *Altererythrobracter* and unclassified clades. A different taxonomic  
438 profile in BAC samples reported the preeminence of *Loktanella*, *Gilvibacter*, *Erythrobracter*, *Sphingorhabdus*,  
439 *Sulfitobacter*, *Arenicella*, *Dokdonia*, *Lentimonas*, *Aquimarina* and unclassified clades. The high abundance of  
440 other taxa at the genus level could either be attributed to the presence of diverse rare taxa or to the lack of  
441 alignment of certain taxa in the database, however that was not observed at a higher taxonomic level (Figure  
442 4).

443 The genus *Portibacter* (family Saprospiraceae) which was abundant in both PDMS and FRC samples,  
444 belongs to the phylum Bacteroidetes which is characterised by wide distribution in a variety of ecosystems, the  
445 capacity for breaking down a diverse range of organic biomacromolecules, and the preference of growing  
446 attached to surfaces (Bauer *et al.*, 2006; Fernández-Gómez *et al.*, 2013). The genus *Sulfitobacter* that was  
447 found abundant in all samples in the present study regardless of coating treatment (1.9% - 2.7%), has also  
448 been recorded abundant (1.05%) by Leary *et al.*, (2014) in biofilm samples collected after 7-months from a  
449 moving ship coated with Interspeed® 640, a commercial biocidal antifouling coating that contains cuprous  
450 oxide as biocide.

451 *Gilvibacter*, which was abundant in biofilms from BAC samples used in the present study  
452 (Intersmooth® 7460HS SPC which contains cuprous oxide and copper pyrithione), was previously reported by  
453 Muthukrishnan *et al.*, (2014) as a genus found only in biofilms sampled from panels coated with biocidal  
454 antifouling Intersmooth® 360 SPC (which contains cuprous oxide and zinc pyrithione), and not biofilms  
455 sampled from Intersmooth® 7460HS SPC panels tested alongside. *Gilvibacter* was also shown to greatly  
456 contribute to dissimilarities between bacterial communities developed on other biocidal antifouling coatings

457 attached to a coated ocean glider, such as Hempel Olympic 86950 (containing cuprous oxide and zineb) and  
458 International® Micron® Extra YBA920 (containing cuprous oxide and dichlofluanid) (Dobretsov *et al.*, 2019).  
459 Sequences belonging to the genus *Erythrobacter* which were found in high abundance in this study (1.8% –  
460 5%), were previously identified on biofilms from two moving ships travelling from Norfolk North and Baltic  
461 Seas (7.7%), and Norfolk to Rota, Spain (21.3%) (Leary *et al.*, 2014), as well as in biofilms on panels coated with  
462 cuprous oxide-containing antifouling paints (Muthukrishnan *et al.*, 2014) and biofilms on a coated ocean glider  
463 off the coast of Muscat, Oman (Dobretsov *et al.*, 2019). *Sphingorhabdus* (class Alphaproteobacteria, family  
464 Sphingomonadaceae) was also abundant in BAC samples (3.6%), nevertheless it was totally absent from the  
465 PDMS or FRC samples.

#### 466 **4.2 | Differences between the biofilm communities on BAC and FRC coatings**

467 The biofilm community profiles in the present study revealed major differences in OTU relative abundance and  
468 richness between the two fouling control coating treatments. Biofilm community structure was found  
469 significantly different between BAC and FRC samples for all taxonomic levels tested with ANOSIM. The  
470 differences between sample communities on the two fouling control coatings that resulted from SIMPER  
471 analysis (Table 3) were mainly driven by *Loktanella*, *Gilvibacter*, *Sphingorhabdus*, and *Erythrobacter*; sequences  
472 with high similarity to these taxa were found abundant in BAC samples, as shown in Figure 5. Additionally,  
473 SIMPER analysis illustrated that *Portibacter* and Sva0996 marine group which were abundant on the FRC  
474 surface (Figure 5), constituted key components defining the different community profiles between the two  
475 fouling control coatings.

476 Biofilm communities found on FRC panels were similar to those on PDMS surfaces, whilst BAC biofilms  
477 exhibited a distinct response, as indicated by sample clustering in the PCoA plot (Figure 2). The highest biofilm  
478 diversity indicated by all diversity indices (Table 2) was found on the PDMS and FRC surfaces. The biofilm  
479 profile of BAC panels was characterized by a lower diversity and a higher relative abundance of the present  
480 taxa.

481 In terms of the BAC biofilm community profile, the higher relative abundance may be due to the  
482 relative proliferation of a few biocide-tolerant taxa or may be a result of species competition which shifted the  
483 community composition. The observed relatively high abundance of few taxa in BAC biofilms is consistent with  
484 earlier (microscopic) investigations of biofilm composition and relative abundance in samples from fouling-  
485 release and biocidal antifouling coated surfaces, that revealed lower abundance and higher diversity in  
486 samples from fouling-release surfaces (Cassé & Swain, 2006). The lower diversity observed here in BAC  
487 samples could be attributed to the effect of biocides in inhibiting the settlement of certain taxa that exhibit a  
488 sensitivity towards biocidal toxicity, such as *Portibacter* (0.09%) or Sva0996 marine group (0.06%) that were  
489 almost absent in BAC samples. Conversely, the highest relative abundance reflected by the contribution of  
490 dominant taxa to the overall community of each sample, was detected in BAC samples, followed by FRC and  
491 PDMS. Potential biocidal-tolerance could be reflected by changes in relative abundance evident for the class of  
492 BD7-11 (phylum Planctomycetes) that was absent in biofilms sampled from the other two coatings (BAC: 1.0%,  
493 FRC, PDMS: 0%). Additionally, the genera found present on BAC samples and missing on FRC were:  
494 *Sphingorhabdus* (BAC: 3.7%, FRC: 0%), *Aquimarina* (BAC: 2%, FRC: 0%), *Marinobacter* (BAC: 1.6%, FRC: 0%),  
495 HTCC5015 (BAC: 1.6%, FRC: 0%) and *Maribacter* (BAC: 0.7%, FRC: 0%).

496 Alphaproteobacteria that dominated BAC surface biofilms (i.e. *Loktanella*, *Erythrobacter*,  
497 *Sphingorhabdus*) were different from those dominating FRC surface biofilms (i.e. *Robiginitomaculum*), which is  
498 a possible indication of diverse synergistic relationships between abundant bacteria present in these biofilms.  
499 Cyanobacteria have been suggested to exhibit high resistance to heavy metals leaching out of biocidal  
500 antifouling coatings (Cassier-Chauvat & Chauvat, 2015) and were previously reported abundant on biocidal  
501 antifouling coated surfaces (Muthukrishnan *et al.*, 2014; Leary *et al.*, 2014). The present study shows the  
502 opposite, since Cyanobacteria (class Oxyphotobacteria) detected sequences dominated PDMS (4.6%) and FRC  
503 (1.39%) surfaces, contrary to BAC (0.1%). It has to be noted that high dominance of Cyanobacteria on BAC  
504 coatings has been suggested after 1 year of immersion in Oman (Muthukrishnan *et al.*, 2014) and after 7-  
505 month on two moving vessels crossing North and Baltic Seas, and North-East Atlantic Ocean respectively  
506 (Leary *et al.*, 2014). Here, Cyanobacteria were not abundant on BAC that was exposed for 4-months in  
507 Langstone Harbour UK.

508 Certain bacterial genera such as *Loktanella* and *Gilvibacter*, that possibly exhibit tolerance to biocides  
509 contained in BAC, potentially reduced the settlement or growth of other organisms on BAC that were  
510 abundant in the other two surfaces (e.g. *Portibacter*) (Figure 5). In comparison with the PDMS, *Portibacter* was  
511 the only bacterial genus where the relative abundance was reduced in both coatings, BAC and FRC. On the BAC  
512 panels, two factors that possibly involved in shaping the shifted community are the performance of the

513 biocidal paint and the interplay between biofilm components at certain conditions (e.g. biocidal release rate,  
514 environmental conditions, antagonistic relationships).

### 515 **4.3 | Study design suggestions for biofilm research on fouling control surfaces**

516 The current study has carefully implemented the most relevant design (four biological replicates were tested,  
517 with immediate biofilm storage in liquid nitrogen, targeting the V4-V5 region of 16S rRNA gene, using Illumina  
518 MiSeq NGS technology, sequence annotation against the SILVA SSU 132 database, etc.) to support the purpose  
519 of the study, as many factors during experimental design and data analysis could significantly impact the  
520 results - especially in a complex microbial community.

521 The V4-V5 region of the 16S rRNA gene has been one of the most broadly used variable regions in  
522 studies examining environmental biofilms on artificial surfaces (e.g. Li *et al.*, 2017; Pereira *et al.*, 2017; Bakal *et al.*,  
523 2018), while 515F/926R has been suggested as a primer set that increases percentage detection of various  
524 prokaryotic taxa (Pollet *et al.*, 2018) as well as been the most effective region in minimising overestimation  
525 due to intragenomic heterogeneity (Sun *et al.*, 2013).

526 For microbial community analyses, Illumina platform followed by Roche 454 are the most widely used  
527 NGS platforms, due to the large output and cost performance (Fukuda *et al.*, 2016; van Dijk *et al.*, 2018) which  
528 are indispensable in complex and diverse study systems. Briefly, 454 platform generates long read length in  
529 low throughput (Nikolaki & Tsiamis, 2013) that suffers from errors related to homopolymeric tracts, whilst  
530 Illumina produces high throughput and short read length with low error rate (de Sá *et al.*, 2018).

531 The selection of 16S rRNA sequence reference database is an important element for taxonomic  
532 classifications, therefore it is worth mentioning that only Briand *et al.*, (2017) have used the SILVA SSU  
533 database similar to the present study, whilst other studies of biofilms on fouling control have used the RDP  
534 (Muthukrishnan *et al.*, 2014; von Ammon *et al.*, 2018; Dobretsov *et al.*, 2019) or Greengenes (Hunsucker *et al.*,  
535 2018; Winfield *et al.*, 2018) databases. SILVA database constitutes one of the most actively maintained and  
536 largest databases which includes curated 16S rRNA gene sequences (Quast *et al.*, 2013; Yilmaz *et al.*, 2014),  
537 while it has been suggested that it provides the lowest error rates compared to Greengenes, and RDP (Lu &  
538 Salzberg, 2020).

539 It is worth highlighting, that in biofilm studies on fouling control it is difficult to examine a “true”  
540 control to enable understanding the effect of specific coatings to the already existing communities due to the  
541 extent of macrofouling. Moreover, the free-living microorganisms in the surrounding seawater at the time of  
542 sample collection, could not serve as an indicator sample for comparison with mature biofilms developed on  
543 fouling control surfaces. The limited number of studies employed to date, have examined biofilm composition  
544 on different types of fouling control coatings without testing a reference surface (Winfield *et al.*, 2018;  
545 Hunsucker *et al.*, 2018).

546 In the present study, the generic unmodified PDMS coating was included as an inert surface to reflect  
547 the representative biofilm communities under the given conditions (e.g. location, season). Unmodified PDMS is  
548 not suitable for commercial use as a fouling control product. However, it shares some surface characteristics  
549 with fouling-release coatings as an elastomeric material with a very smooth surface profile, and it  
550 demonstrates greater resistance to macrofouling compared to other unprotected artificial surfaces which is a  
551 useful pragmatic property for field studies, as was exemplified in this study: the completely inert stainless steel  
552 panels that were immersed during this study simultaneously with the coated panels were found heavily fouled  
553 by macrofoulers, and biofilm recovery was impossible, in contrast to the PDMS. It is therefore advantageous to  
554 incorporate a non-toxic, inert, and macrofouling-resistant surface in fouling control research studies in order  
555 to: (1) improve understanding of the microfouling communities that form with respect to coating properties,  
556 (2) better contextualise similarities and differences that arise between the complex biofilm communities that  
557 develop on different surfaces, and (3) discover potential interplay between biofilm taxonomic components.

558 It is important to highlight that the fouling control coatings used in this study are designed primarily  
559 for use on the world’s commercial shipping fleet, whose operational profiles typically involve alternating static  
560 periods in and around port and periods of active movement at sea. Notwithstanding the substantially static  
561 conditions under which the test panels were deployed in the present study (tidal-flow only), the current  
562 research outcomes are indicative of the compositional and relative abundance differences of marine biofilms  
563 that develop on coated toxic and non-toxic surfaces with divergent material properties and could be used as a  
564 guide in future experiments.

## 565 5 | CONCLUSION

566 The present investigation has added to the growing body of biofilm studies on fouling control coatings using  
567 NGS analysis, demonstrating that fouling control coating properties can significantly influence microfouling  
568 development. Distinct biofilm profiles were reported between the three coating types; the biocidal antifouling  
569 coating “BAC” displayed higher abundance and lower diversity compared to the other two surfaces, while in  
570 contrast the fouling-release coating “FRC” showed strong similarities with the generic unmodified “PDMS”  
571 coating. The biocides contained in the examined BAC coating (Intersmooth® 7460HS SPC) were cuprous oxide  
572 and copper pyrithione, and demonstrated a clear impact on the biofilm community composition.

573 Even though biocidal antifouling coatings largely prevent macrofouling, they also lead to the  
574 development of very different biofilm communities. The biofilm community that develops on biocidal coating  
575 surfaces may encompass important components with specialized behavior driven by their unique genes. The  
576 outcomes of the current study suggest that Alphaproteobacteria (genus Loktanella, Sphingorhabdus, and  
577 Erythrobacter) and Bacteroidetes (genus Gilvibacter) may exhibit high tolerance to the biocide flux emanating  
578 from BAC Intersmooth® 7460HS SPC under the test conditions that were deployed. Potential lack of biocidal-  
579 tolerance and selective attachment on FRC Intersleek® 900 is suggested for a group of Bacteroidetes (genus  
580 Portibacter) and Actinobacteria (genus Sva0996 marine group). Reporting key biofilm components with  
581 tolerance to biocides and exploring the gene expression of these versatile communities is fundamental for  
582 controlling microfouling.

583 In order to realistically eradicate toxic biocides from fouling control paints, effective and robust  
584 alternatives must be developed. In this study, it was shown that the examined FRC did not have a large effect  
585 in biofilm composition and relative abundance when compared to an inert surface (i.e. PDMS). However,  
586 fouling-release coatings should also be tested under dynamic conditions which more closely reflect their  
587 expected in-service exposure conditions, while the largely static conditions in the current study were not  
588 representative of a moving vessel (tidal movement only). Future investigations may shed light on the gene  
589 expression profiles of these complex biofilm communities and identify key genes that contribute to efficiency  
590 against biocides. The examination of biofilms formed on commercial fouling control coatings used in ship’s  
591 hulls will provide keystone information to scientists and manufacturers in designing more robust and  
592 environmentally compatible fouling control systems. The outcomes of this project are anticipated to have  
593 important implications for the future development of novel fouling control surfaces.

## 594 595 ACKNOWLEDGMENTS

596 We gratefully acknowledge Prof. Jeremy S Webb (University of Southampton) and Dr. Athanasios Rizoulis  
597 (University of Portsmouth) for discussions on data analysis, and Dr Alistair A Finnie (International Paints) for  
598 editorial review. We would like to thank Dr. Paul Farrell, Mr. Marc Martin, Dr. Graham Malyon (University of  
599 Portsmouth) for helping with raft access where the experiments took place. We also thank Ms. Beatrice  
600 Landoni and Dr. Harry Austin for the kind support during the labour-intensive collection of samples, and Dr.  
601 Andrew Steinberger for the gentle provision of the *kruskal.pretty* script and troubleshooting advice.

602 M.P. was funded by the UNIVERSITY OF PORTSMOUTH with a PhD scholarship grant number  
603 35030/SC00049BIOL. M.S. was part-funded by a UNIVERSITY OF PORTSMOUTH Research and Innovation  
604 development award. S.D. was funded by SULTAN QABOOS UNIVERSITY and Omantel EG/SQU-OT/20/01. S.R.  
605 and J.W. were partly funded by RESEARCH ENGLAND with an Expanding Excellence in England (E3) grant.

## 607 608 CONFLICTS OF INTEREST

609 None declared.

## 610 611 AUTHOR CONTRIBUTIONS

612 **Maria Papadatou:** Methodology (equal), Investigation (lead), Data curation (equal), Formal analysis  
613 (supporting), Visualization (lead), Writing- original draft (lead), Writing-review & editing (equal). **Samuel C.**  
614 **Robson:** Data curation (equal), Formal analysis (lead), Software (lead), Writing-review & editing (equal),  
615 Supervision (supporting). **Sergey Dobretsov:** Writing- original draft (supporting), Writing-review & editing  
616 (supporting), Funding acquisition (supporting). **Joy E.M. Watts:** Writing-review & editing (supporting). **Jennifer**  
617 **Longyear:** Resources (supporting), Writing-review & editing (supporting). **Maria Salta:** Conceptualization  
618 (lead), Methodology (equal), Investigation (supporting), Writing-review & editing (equal), Supervision (lead),  
Project administration (lead), Funding acquisition (lead).

619  
620  
621  
622  
623  
624  
625  
626  
627  
628  
629  
630  
631  
632  
633  
634  
635  
636  
637  
638  
639  
640  
641  
642  
643  
644  
645  
646  
647  
648  
649  
650  
651  
652  
653  
654  
655  
656  
657  
658  
659  
660  
661  
662  
663  
664  
665  
666  
667  
668  
669  
670  
671  
672  
673

## ORCID

*Maria Papadatou* <https://orcid.org/0000-0002-3612-2427>  
Samuel C. Robson <https://orcid.org/0000-0001-5702-9160>  
*Joy E.M. Watts* <https://orcid.org/0000-0001-9595-0540>  
*Sergey Dobretsov* <https://orcid.org/0000-0002-1769-6388>  
Jennifer Longyear <https://orcid.org/0000-0003-2153-0951>  
Maria Salta <https://orcid.org/0000-0002-4033-0720>

## REFERENCES

- Bakal, T.; Janata, J.; Sabova, L.; Grabic, R.; Zlabek, V.; Najmanova, L. (2018). Suitability and setup of next-generation sequencing-based method for taxonomic characterization of aquatic microbial biofilm. *Folia Microbiologica*, 64, 9–17, doi:10.1007/s12223-018-0624-1.
- Bauer, M.; Kube, M.; Teeling, H.; Richter, M.; Lombardot, T.; Allers, E.; Würdemann, C.A.; Quast, C.; ... Glöckner, F.O (2006). Whole genome analysis of the marine Bacteroidetes “*Gramella forsetii*” reveals adaptations to degradation of polymeric organic matter. *Environmental Microbiology*, 8, 2201–2213, doi:10.1111/j.1462-2920.2006.01152.x.
- Bolyen, E.; Rideout, J.R.; Dillon, M.R.; Bokulich, N.A.; Abnet, C.C.; Al-Ghalith, G.A.; Alexander, H.; Alm, E.J.; ... Caporaso J.G. (2019). Reproducible, interactive, scalable and extensible microbiome data science using QIIME 2. *Nature Biotechnology*, 37, 852–857, doi:10.1038/s41587-019-0209-9.
- Briand, J.F.; Barani, A.; Garnier, C.; Réhel, K.; Urvois, F.; LePoupon, C.; Bouchez, A.; Debroas, D.; Bressy, C. (2017). Spatio-temporal variations of marine biofilm communities colonizing artificial substrata including antifouling coatings in contrasted French coastal environments. *Microbial Ecology*, 74, 585–598, doi:10.1007/s00248-017-0966-2.
- Briand, J.F.; Djeridi, I.; Jamet, D.; Coupé, S.; Bressy, C.; Molmeret, M.; Le Berre, B.; Rimet, F.; Bouchez, A.; Blache, Y. (2012). Pioneer marine biofilms on artificial surfaces including antifouling coatings immersed in two contrasting French Mediterranean coast sites. *Biofouling*, 28, 453–463, doi:10.1080/08927014.2012.688957.
- Camps, M.; Barani, A.; Gregori, G.; Bouchez, A.; le Berre, B.; Bressy, C.; Blache, Y.; Briand, J.F. (2014). Antifouling coatings influence both abundance and community structure of colonizing biofilms: A case study in the Northwestern Mediterranean Sea. *Applied and Environmental Microbiology*, 80, 4821–4831, doi:10.1128/AEM.00948-14.
- Cassé, F.; Swain, G.W. (2006). The development of microfouling on four commercial antifouling coatings under static and dynamic immersion. *International Biodeterioration & Biodegradation*, 57, 179–185. doi:10.1016/j.ibiod.2006.02.008.
- Cassier-Chauvat, C.; Chauvat, F. (2015). Responses to oxidative and heavy metal stresses in cyanobacteria: Recent advances. *International Journal of Molecular Sciences*, 16(1), 871–886, doi:10.3390/ijms16010871.
- Chambers, L.D.; Stokes, K.R.; Walsh, F.C.; Wood, R.J.K. (2006). Modern approaches to marine antifouling coatings. *Surface and Coatings Technology*, 201, 3642–3652, doi:10.1016/j.surfcoat.2006.08.129.
- Clarke, K.R. (1993). Non-parametric multivariate analyses of changes in community structure. *Australian Journal of Ecology*, 18, 117–143. doi:10.1111/j.1442-9993.1993.tb00438.x.
- Costerton, J.W. (1999). Introduction to biofilm. *International Journal of Antimicrobial Agents*, 11, 217–221, doi:10.1016/s0924-8579(99)00018-7.
- de Sá, P.H.C.G; Guimarães, L.C.; das Graças, D.A.; de Oliveira Veras, A.A.; Barh, D.; Azevedo, V.; da Costa da Silva, A.L.; Ramos, R.T.J. (2018). Next-Generation Sequencing and Data Analysis: Strategies, Tools, Pipelines and Protocols. In: *Omic Technologies and Bio-Engineering*, 191-207. doi:10.1016/B978-0-12-804659-3.00011-7.
- Ding, W.; Zhang, W.; Alikunhi, N.M.; Batang, Z.; Pei, B.; Wang, R.; Chen, L.; Al-Suwailem, A.; Qian, P.Y. (2019). Metagenomic analysis of zinc surface-associated marine biofilms. *Microbial Ecology*, 77, 406–416, doi:10.1007/s00248-018-01313-3.
- Dobretsov, S.; Abed, R.M.M.; Muthukrishnan, T.; Sathe, P.; Al-Naamani, L.; Queste, B.Y.; Piontkovski, S. (2019). Living on the edge: biofilms developing in oscillating environmental conditions. *Biofouling*, 34, 1064–1077, doi:10.1080/08927014.2018.1539707.
- Dobretsov, S.; Abed, R.M.M.; Teplitski, M. (2013). Mini-review: Inhibition of biofouling by marine microorganisms. *Biofouling*, 29, 423–441. doi:10.1080/08927014.2013.776042.

- 674 Fernández-Gómez, B.; Richter, M.; Schüler, M.; Pinhassi, J.; Acinas, S.G.; González, J.M.; Pedrós-Alió, C. (2013).  
675 Ecology of marine bacteroidetes: A comparative genomics approach. *The ISME Journal*, 7, 1026–1037,  
676 doi:10.1038/ismej.2012.169.
- 677 Finnie, A.A.; Williams, D.N. (2010). Paint and coatings technology for the control of marine fouling. *Biofouling*,  
678 185–206, doi:10.1002/9781444315462.ch13.
- 679 Flach, C.F.; Pal, C.; Svensson, C.J.; Kristiansson, E.; Östman, M.; Bengtsson-Palme, J.; Tysklind, M.; Larsson,  
680 D.G.J. (2017). Does antifouling paint select for antibiotic resistance? *The Science of the Total Environment*,  
681 590–591, 461–468, doi:10.1016/j.scitotenv.2017.01.213.
- 682 Fukuda, K.; Ogawa, M.; Taniguchi, H.; Saito, M. (2016). Molecular approaches to studying microbial  
683 communities: targeting the 16S ribosomal RNA gene. *Journal of UOEH.*, 38(3), 223–32.  
684 doi:10.7888/juoeh.38.223.
- 685 Gentleman, R.C.; Carey, V.J.; Bates, D.M.; Bolstad, B.; Dettling, M.; Dudoit, S.; Ellis, B.; Gautier, L.; Ge, Y.;  
686 Gentry, J.; Hornik, K.; Hothorn, T.; Huber, W.; Iacus, S.; Irizarry, R.; Leisch, F.; Li, C.; Maechler, M.; Rossini,  
687 A.J.; Sawitzki, G.; Smith, C.; Smyth, G.; Tierney, L.; Yang, J.Y.; Zhang, J. (2004). Bioconductor: open software  
688 development for computational biology and bioinformatics. *Genome Biology*, 5(10), R80. doi:10.1186/gb-  
689 2004-5-10-r80.
- 690 Harder, T. (2008). Marine Epibiosis: concepts, ecological consequences and host defence. In: *Marine and*  
691 *Industrial Biofouling*. 1–13. doi:10.1007/978-3-540-69796-1\_12
- 692 Holmström, C.; Egan, S.; Franks, A.; McCloy, S.; Kjelleberg, S. (2006). Antifouling activities expressed by marine  
693 surface associated *Pseudoalteromonas* species. *FEMS Microbiology Ecology*, 41, 47–58,  
694 doi:10.1111/j.1574-6941.2002.tb00965.x.
- 695 Huggett, M.J.; Nedved, B.T.; Hadfield, M.G. (2009). Effects of initial surface wettability on biofilm formation  
696 and subsequent settlement of *Hydroides elegans*. *Biofouling*, 25, 387–399,  
697 doi:10.1080/08927010902823238.
- 698 Hunsucker, K.Z.; Vora, G.J.; Hunsucker, J.T.; Gardner, H.; Leary, D.H.; Kim, S.; Lin, B.; Swain, G. (2018). Biofilm  
699 community structure and the associated drag penalties of a groomed fouling release ship hull coating.  
700 *Biofouling*, 34, 162–172, doi:10.1080/08927014.2017.1417395.
- 701 Leary, D.H.; Li, R.W.; Hamdan, L.J.; Hervey, W.J.; Lebedev, N.; Wang, Z.; Deschamps, J.R.; Kusterbeck, A.W.;  
702 Vora, G.J. (2014). Integrated metagenomic and metaproteomic analyses of marine biofilm communities.  
703 *Biofouling*, 30, 1211–1223, doi:10.1080/08927014.2014.977267.
- 704 Lejars, M.; Margailan, A.; Bressy, C. (2012). Fouling release coatings: A nontoxic alternative to biocidal  
705 antifouling coatings. *Chemical Reviews*, 112, 4347–4390. doi:10.1021/cr200350v.
- 706 Li, S.; Peng, C.; Wang, C.; Zheng, J.; Hu, Y.; Li, D. (2017). Microbial succession and nitrogen cycling in cultured  
707 biofilms as affected by the inorganic nitrogen availability. *Microbial Ecology*, 73, doi:10.1007/s00248-016-  
708 0827-4.
- 709 Lu J.; Salzberg S.L. (2020). Ultrafast and accurate 16S rRNA microbial community analysis using Kraken 2.  
710 *Microbiome*, 8(1):124. doi:10.1186/s40168-020-00900-2.
- 711 McMurdie, P.J.; Holmes, S. (2013). phyloseq: An R package for reproducible interactive analysis and graphics of  
712 microbiome census data. *PLoS ONE*, 8(4), e61217. doi:10.1371/journal.pone.0061217
- 713 Molino, P.J.; Campbell, E.; Wetherbee, R. (2009). Development of the initial diatom microfouling layer on  
714 antifouling and fouling-release surfaces in temperate and tropical Australia. *Biofouling*, 25, 685–694,  
715 doi:10.1080/08927010903089912.
- 716 Muthukrishnan, T.; Abed, R.M.M.; Dobretsov, S.; Kidd, B.; Finnie, A.A. (2014). Long-term microfouling on  
717 commercial biocidal fouling control coatings. *Biofouling*, 30, 1155–1164,  
718 doi:10.1080/08927014.2014.972951.
- 719 Nikolaki, S.; Tsiamis, G. (2013). Microbial diversity in the era of omic technologies. *BioMed Research*  
720 *International*, 2013, 958719. doi:10.1155/2013/958719.
- 721 Oksanen, J.; Blanchet, F.G.; Friendly, M.; Kindt, R.; Legendre, P.; McGlenn, D.; Minchin, P.R.; O'Hara, R.B.;  
722 Simpson, G.L.; Solymos, P.; Stevens, M.H.H.; Szoecs, E.; Wagner, H. (2019). vegan: community ecology  
723 package; R package version 2.5-6. Available online: URL <https://cran.r-project.org/package=vegan>
- 724 Parada, A.E.; Needham, D.M.; Fuhrman, J.A. (2016). Every base matters: Assessing small subunit rRNA primers  
725 for marine microbiomes with mock communities, time series and global field samples. *Environmental*  
726 *Microbiology*, 18, 1403–1414, doi:10.1111/1462-2920.13023.
- 727 Peimbert, M.; Alcaraz, L.D. (2016). A hitchhiker's guide to metatranscriptomics. In: *Field Guidelines for Genetic*  
728 *Experimental Designs in High-Throughput Sequencing*. doi:10.1007/978-3-319-31350-4\_13

- 729 Pereira, R.P.A.; Peplies, J.; Höfle, M.G.; Brettar, I. (2017). Bacterial community dynamics in a cooling tower with  
730 emphasis on pathogenic bacteria and *Legionella* species using universal and genus-specific deep  
731 sequencing. *Water Research*, 122, 363–376, doi:10.1016/j.watres.2017.06.011.
- 732 Pollet, T.; Berdjeb, L.; Garnier, C.; Durrieu, G.; Le Poupon, C.; Misson, B.; Jean-François, B. (2018). Prokaryotic  
733 community successions and interactions in marine biofilms: the key role of Flavobacteriia. *FEMS  
734 Microbiology Ecology*, 94, doi:10.1093/femsec/fiy083.
- 735 Pruesse, E.; Peplies, J.; Glöckner, F.O. (2012). SINA: Accurate high-throughput multiple sequence alignment of  
736 ribosomal RNA genes. *Bioinformatics*, 28, 1823–1829, doi:10.1093/bioinformatics/bts252.
- 737 Quast, C.; Pruesse, E.; Yilmaz, P.; Gerken, J.; Schweer, T.; Yarza, P.; Peplies, J.; Glöckner, F.O. (2013). The SILVA  
738 ribosomal RNA gene database project: Improved data processing and web-based tools. *Nucleic Acids  
739 Research*, 41, 590–596, doi:10.1093/nar/gks1219.
- 740 R Core Team. (2020). R: A language and environment for statistical computing; R foundation for statistical  
741 computing: Vienna, Austria. Available online: URL <https://www.R-project.org/>.
- 742 Railkin Al. (2004). Marine biofouling: colonization processes and defenses. *Boca Raton (FL): CRC Press*. p. 320.  
743 doi:10.1201/9780203503232.
- 744 Salta, M.; Wharton, J.A.; Blache, Y.; Stokes, K.R.; Briand, J.F. (2013). Marine biofilms on artificial surfaces:  
745 Structure and dynamics. *Environmental Microbiology*, 15, 2879–2893. doi:10.1111/1462-2920.12186.
- 746 Steinberger A. (2016). seq-scripts release v. 1.0. Available online: URL doi:10.5281/zenodo.1458243
- 747 Sun, D.L.; Jiang, X.; Wu, Q.L.; Zhou, N.Y. (2013). Intragenomic heterogeneity of 16S rRNA genes causes  
748 overestimation of prokaryotic diversity. *Applied and Environmental Microbiology*, 79, 5962–5969,  
749 doi:10.1128/AEM.01282-13.
- 750 van Dijk, E.L.; Jaszczyszyn, Y.; Naquin, D.; Thermes, C. (2018). The third revolution in sequencing technology.  
751 *Trends in Genetics*, 34(9):666-681. doi:10.1016/j.tig.2018.05.008.
- 752 von Ammon, U.; Wood, S.A.; Laroche, O.; Zaiko, A.; Tait, L.; Lavery, S.; Inglis, G.; Pochon, X. (2018). The impact  
753 of artificial surfaces on marine bacterial and eukaryotic biofouling assemblages: A high-throughput  
754 sequencing analysis. *Marine Environmental Research*, 133, 57-66. doi:10.1016/j.marenvres.2017.12.003.
- 755 Wahl, M. (1989). Marine epibiosis. I. Fouling and antifouling: some basic aspects. *Marine Ecology Progress  
756 Series*, 58, 175–189, doi:10.3354/meps058175.
- 757 Wickham H. (2016). ggplot2: Elegant graphics for data analysis. Springer-Verlag New York. ISBN 978-3-319-  
758 24277-4. Available online: URL <https://ggplot2.tidyverse.org>
- 759 Winfield, M.O.; Downer, A.; Longyear, J.; Dale, M.; Barker, G.L.A. (2018). Comparative study of biofilm  
760 formation on biocidal antifouling and fouling-release coatings using next-generation DNA sequencing.  
761 *Biofouling*, 34, 464–477, doi:10.1080/08927014.2018.1464152.
- 762 Yilmaz, P.; Parfrey, L.W.; Yarza, P.; Gerken, J.; Pruesse, E.; Quast, C.; Schweer, T.; Peplies, J.; Ludwig, W.;  
763 Glöckner, F.O. (2014). The SILVA and “all-species Living Tree Project (LTP)” taxonomic frameworks.  
764 *Nucleic Acids Research*, 42, 643–648, doi:10.1093/nar/gkt1209.
- 765 Zobell, C.E.; Allen, E.C. (1935). The Significance of marine bacteria in the fouling of submerged surfaces. *Journal  
766 of Bacteriology*, 29(3): 239–251, doi:10.1128/JB.29.3.239-251.1935.

767  
768  
769  
770  
771  
772  
773  
774  
775  
776  
777  
778  
779  
780  
781  
782  
783  
784  
785



786  
787  
788  
789  
790  
791  
792
